# Supplementary material for: Coronary Microvascular Endothelial Dysfunction in Patients With Angina and Nonobstructive Coronary Artery Disease Is Associated With Elevated Serum Homocysteine Levels
Source: PubMed Central journal article supplement — J Am Heart Assoc. 2020 Sep 30;9(19):e017746. doi: 10.1161/JAHA.120.017746 (PMC7792413; doi:10.1161/jaha.120.017746), 2020-09-30
Supplement: JAH3-9-e017746-s001.pdf [file JAH3-9-e017746-s001.pdf]

# **SUPPLEMENTAL MATERIAL**

**Table S1. Baseline characteristics comparing patients with versus without supplementation of vitamin B6, B12, and/or folate.**

|                                      | <b>B-vitamin Use</b>         |                              | <b>P value</b> |
|--------------------------------------|------------------------------|------------------------------|----------------|
|                                      | <b>No</b><br><b>N = 1074</b> | <b>Yes</b><br><b>N = 344</b> |                |
| <b>Clinical Parameters</b>           |                              |                              |                |
| Age                                  | 49.8 ± 12.2                  | 55.3 ± 11.8                  | <0.0001        |
| Females, n (%)                       | 682 (63.4)                   | 257 (74.3)                   | 0.0002         |
| Body mass index (kg/m <sup>2</sup> ) | 28.6 [24.8; 32.7]            | 27.4 [24.0; 32.2]            | 0.07           |
| Hypertension, n (%)                  | 873 (81.3)                   | 278 (80.8)                   | 0.85           |
| Systolic BP (mmHg)                   | 124 ± 16                     | 125 ± 18                     | 0.6            |
| Diastolic BP (mmHg)                  | 75 ± 10                      | 75 ± 10                      | 0.8            |
| Diabetes mellitus, n (%)             | 119 (11.1)                   | 39 (11.3)                    | 0.9            |
| HbA1c (%)                            | 5.3 [5; 5.6]                 | 5.4 [5.1; 5.6]               | 0.04           |
| Dyslipidemia, n (%)                  | 610 (56.7)                   | 221 (63.9)                   | 0.02           |
| LDL Cholesterol (mg/dL)              | 103 ± 36                     | 100 ± 37                     | 0.2            |
| HDL Cholesterol (mg/dL)              | 53 ± 18                      | 57 ± 18                      | 0.001          |
| Triglycerides (mg/dL)                | 106 [74; 158]                | 103 [70; 145]                | 0.11           |
| Creatinine (mg/dL)                   | 0.96 ± 0.29                  | 0.92 ± 0.19                  | 0.002          |
| CKD, n (%)                           | 120 (11.2)                   | 49 (14.3)                    | 0.12           |
| Smoking history, n (%)               | 513 (47.7)                   | 145 (42.0)                   | 0.07           |
| ΔCBF (%)                             | 44 [-7; 108]                 | 45 [-5; 100]                 | 0.7            |
| Homocysteine (μmol/L)                | 8 [6; 10]                    | 7 [6; 9]                     | <0.0001        |
| <b>Medications</b>                   |                              |                              |                |
| Aspirin, n (%)                       | 560 (52.0)                   | 196 (56.7)                   | 0.14           |
| Statin, n (%)                        | 430 (40.0)                   | 161 (46.5)                   | 0.03           |

|                          |            |            |     |
|--------------------------|------------|------------|-----|
| Anti-hypertensive, n (%) | 699 (65.0) | 228 (65.9) | 0.8 |
| Anti-diabetic, n (%)     | 83 (7.7)   | 22 (6.4)   | 0.4 |
| Diuretics, n (%)         | 175 (16.3) | 65 (18.8)  | 0.3 |

BP: Blood Pressure, LDL: Low-density lipoproteins, HDL: High density lipoproteins, eGFR: estimated glomerular filtration rate, CKD: Chronic Kidney Disease,  $\Delta$ CBF: Blood flow change
